# Supplementary material for: 6 versus 12 months of adjuvant trastuzumab for HER2-positive early breast cancer (PERSEPHONE): 4-year disease-free survival results of a randomised phase 3 non-inferiority trial
Source: PubMed Central journal article supplement (PMC6615016; doi:10.1016/s0140-6736(19)30650-6), 2019-06-29
Supplement: mmc1.pdf [file mmc1.pdf]

# THE LANCET

## Supplementary appendix

This appendix formed part of the original submission and has been peer reviewed. We post it as supplied by the authors.

Supplement to: Earl HM, Hiller L, Vallier A-L, et al. 6 versus 12 months of adjuvant trastuzumab for HER2-positive early breast cancer (PERSEPHONE): 4-year disease-free survival results of a randomised phase 3 non-inferiority trial. *Lancet* 2019; published online June 6. [http://dx.doi.org/10.1016/S0140-6736\(19\)30650-6](http://dx.doi.org/10.1016/S0140-6736(19)30650-6).

## Web Extra Material

### Contents

|                                                                        |    |
|------------------------------------------------------------------------|----|
| Supplementary Figures and Tables .....                                 | 1  |
| Tables .....                                                           | 1  |
| Figures .....                                                          | 7  |
| Contributors .....                                                     | 16 |
| Committee Members .....                                                | 16 |
| Contributing sites and consultants .....                               | 17 |
| Trial Investigators/contributing sites, PIs, and patient numbers ..... | 20 |

### Supplementary Figures and Tables

Tables

#### Supplementary Table 1: Trastuzumab treatment received prior to randomisation

| Number of Trastuzumab cycles received prior to randomisation | 12-month group (N=2045) | 6-month group (N=2043) | Total (N=4088) |
|--------------------------------------------------------------|-------------------------|------------------------|----------------|
| 0                                                            | 898 (44%)               | 888 (43%)              | 1786 (44%)     |
| 1                                                            | 293 (14%)               | 289 (14%)              | 582 (14%)      |
| 2                                                            | 207 (10%)               | 205 (10%)              | 412 (10%)      |
| 3                                                            | 171 (9%)                | 142 (7%)               | 313 (8%)       |
| 4                                                            | 109 (5%)                | 119 (6%)               | 228 (5%)       |
| 5                                                            | 110 (5%)                | 121 (6%)               | 231 (6%)       |
| 6                                                            | 95 (5%)                 | 95 (5%)                | 190 (5%)       |
| 7                                                            | 64 (3%)                 | 76 (4%)                | 140 (3%)       |
| 8                                                            | 65 (3%)                 | 60 (3%)                | 125 (3%)       |
| 9                                                            | 33 (2%)                 | 48 (2%)                | 81 (2%)        |

#### Supplementary Table 2: Treatment timing information across chemotherapy types

|                     |             | Anthracycline based | Taxane based | Anthracycline + Taxane based | No Taxane and no Anthracycline |
|---------------------|-------------|---------------------|--------------|------------------------------|--------------------------------|
| Chemotherapy timing | Adjuvant    | 1647 (48%)          | 389 (11%)    | 1427 (41%)                   | 5 (<1%)                        |
|                     | Neoadjuvant | 53 (9%)             | 14 (2%)      | 553 (89%)                    | 0 (0)                          |
| Trastuzumab timing  | Concurrent  | 59 (3%)             | 345 (18%)    | 1499 (79%)                   | 0 (0)                          |
|                     | Sequential  | 1641 (75%)          | 58 (3%)      | 481 (22%)                    | 5 (<1%)                        |

**Supplementary Table 3: Changing characteristics of patients randomised into PERSEPHONE**

|                                   | %   | Year of randomisation |      |      |      |      |      |      |      |      | % over 2007-2015 |
|-----------------------------------|-----|-----------------------|------|------|------|------|------|------|------|------|------------------|
|                                   |     | 2007                  | 2008 | 2009 | 2010 | 2011 | 2012 | 2013 | 2014 | 2015 |                  |
| Concurrent CT and trastuzumab     | 0   | 24                    | 18   | 32   | 36   | 46   | 57   | 69   | 70   | 47   |                  |
| Sequential CT and trastuzumab     | 100 | 76                    | 82   | 68   | 64   | 54   | 43   | 31   | 30   | 53   |                  |
| ER Negative                       | 0   | 38                    | 37   | 35   | 33   | 30   | 28   | 27   | 26   | 31   |                  |
| ER Positive                       | 100 | 62                    | 63   | 65   | 67   | 70   | 72   | 73   | 74   | 69   |                  |
| Anthracycline based CT            | 50  | 63                    | 58   | 48   | 49   | 44   | 35   | 28   | 25   | 42   |                  |
| Taxane based CT                   | 0   | 7                     | 6    | 5    | 5    | 10   | 11   | 17   | 18   | 10   |                  |
| Anthracycline + Taxane based CT   | 50  | 30                    | 36   | 47   | 46   | 46   | 54   | 55   | 57   | 48   |                  |
| No taxane and no anthracycline CT | 0   | 0                     | 0    | <1   | <1   | 0    | 0    | 0    | 0    | <1   |                  |
| Adjuvant CT                       | 100 | 90                    | 90   | 87   | 87   | 86   | 81   | 81   | 80   | 85   |                  |
| Neoadjuvant CT                    | 0   | 10                    | 10   | 13   | 13   | 14   | 19   | 19   | 20   | 15   |                  |
| Total                             | N   | 4                     | 86   | 356  | 573  | 753  | 759  | 589  | 558  | 410  | 4088             |

**Supplementary Table 4: Patient Information, split by concurrent/sequential chemotherapy and trastuzumab, N (%)**

|                                | Concurrent (n=1903) | Sequential (n=2185) | Total (n=4088) | p       |
|--------------------------------|---------------------|---------------------|----------------|---------|
| Randomised Treatment           |                     |                     |                | 0.98    |
| 12 months                      | 951 (50)            | 1094 (50)           | 2045 (50)      |         |
| 6 months                       | 952 (50)            | 1091 (50)           | 2043 (50)      |         |
| ER status *                    |                     |                     |                | 0.65    |
| Negative                       | 596 (31)            | 669 (31)            | 1265 (31)      |         |
| Positive                       | 1307 (69)           | 1516 (69)           | 2823 (69)      |         |
| Chemotherapy type *            |                     |                     |                | <0.0001 |
| Anthracycline based            | 59 (3)              | 1641 (75)           | 1700 (42)      |         |
| Taxane based                   | 345 (18)            | 58 (3)              | 403 (10)       |         |
| Anthracycline + Taxane based   | 1499 (79)           | 481 (22)            | 1980 (48)      |         |
| No taxane and no anthracycline | 0 (0)               | 5 (<1)              | 5 (<1)         |         |
| Chemotherapy timing *          |                     |                     |                | <0.0001 |
| Adjuvant                       | 1412 (74)           | 2056 (94)           | 3468 (85)      |         |
| Neo-adjuvant                   | 491 (26)            | 129 (6)             | 620 (15)       |         |
| Age at randomisation           |                     |                     |                | <0.0001 |
| Median (range)                 | 54 (23-82)          | 57 (23-83)          | 56 (23-83)     |         |
| <35 years old                  | 65 (3)              | 30 (2)              | 95 (2)         | <0.0001 |
| 35 – 49 years old              | 567 (30)            | 542 (27)            | 1109 (27)      |         |
| 50 – 59 years old              | 593 (31)            | 671 (31)            | 1264 (31)      |         |
| 60 +                           | 678 (36)            | 942 (40)            | 1620 (40)      |         |

|                                                          |               |               |               |         |
|----------------------------------------------------------|---------------|---------------|---------------|---------|
| Nodal Status at surgery [of the 3468 adjuvant patients]  |               |               |               | <0.0001 |
| Negative                                                 | 644 (46)      | 1378 (67)     | 2022 (58)     |         |
| 1-3 nodes positive                                       | 509 (36)      | 456 (22)      | 965 (28)      |         |
| 4+ nodes positive                                        | 240 (17)      | 215 (10)      | 455 (13)      |         |
| Unknown                                                  | 19 (1)        | 7 (1)         | 26 (1)        |         |
| Tumour size ^ [of the 3468 adjuvant patients]            |               |               |               | <0.0001 |
| <=2cm                                                    | 581 (41)      | 1050 (51)     | 1631 (47)     |         |
| >2 and <=5cm                                             | 688 (49)      | 876 (43)      | 1564 (45)     |         |
| >5cm                                                     | 89 (6)        | 81 (4)        | 170 (5)       |         |
| Unknown                                                  | 54 (4)        | 49 (2)        | 103 (3)       |         |
| Tumour Grade ^                                           |               |               |               | 0.09    |
| I (well diff.)                                           | 28 (2)        | 35 (2)        | 63 (2)        |         |
| II (mod. diff.)                                          | 560 (29)      | 710 (32)      | 1270 (31)     |         |
| III (poor diff.)                                         | 1233 (65)     | 1386 (63)     | 2619 (64)     |         |
| Unknown                                                  | 82 (4)        | 54 (3)        | 136 (3)       |         |
| Ethnicity                                                |               |               |               | <0.0001 |
| White                                                    | 1469 (77)     | 1837 (84)     | 3306 (81)     |         |
| Asian                                                    | 70 (4)        | 39 (2)        | 109 (3)       |         |
| Black                                                    | 55 (3)        | 42 (2)        | 97 (2)        |         |
| Other                                                    | 24 (1)        | 14 (<1)       | 38 (1)        |         |
| Unknown                                                  | 285 (15)      | 253 (12)      | 538 (13)      |         |
| Menopausal status before chemotherapy                    |               |               |               | 0.006   |
| Pre                                                      | 607 (32)      | 540 (25)      | 1147 (28)     |         |
| Peri                                                     | 134 (7)       | 126 (6)       | 260 (6)       |         |
| Post                                                     | 971 (51)      | 1243 (57)     | 2214 (54)     |         |
| Not assessable/Not available                             | 191 (10)      | 276 (13)      | 467 (12)      |         |
| Reported prior use of cardiac medication                 |               |               |               | 0.93    |
| Yes                                                      | 47 (2)        | 52 (2)        | 99 (2)        |         |
| No                                                       | 1856 (98)     | 2133 (98)     | 3989 (98)     |         |
| IHC <sup>+</sup> -score and FISH <sup>†</sup> positivity |               |               |               | 0.003   |
| 3+                                                       | 1401 (74)     | 1546 (71)     | 2947 (72)     |         |
| 2+ and FISH <sup>†</sup> positive                        | 437 (23)      | 600 (27)      | 1037 (25)     |         |
| Not available                                            | 65 (3)        | 39 (2)        | 104 (3)       |         |
| Median (IQR) Follow-Up (years)                           | 4.5 (3.3-5.9) | 5.8 (4.5-7.4) | 5.4 (3.6-6.7) |         |
| Number of deaths reported                                | 122 (6%)      | 213 (10%)     | 335 (8%)      |         |
| Number of DFS events reported                            | 205 (11%)     | 307 (14%)     | 512 (13%)     |         |

\* Stratification variable

^ of largest invasive tumour at diagnosis

+ IHC = Immunohistochemistry

† FISH = Fluorescence in situ hybridization

IQR = inter-quartile range

DFS events = disease-free survival events (a recorded relapse or death)

**Supplementary Table 5: Reporting of trastuzumab treatment delays**

| Reporting of treatment delays | 12-month group  |                 | 6-month group   |                |
|-------------------------------|-----------------|-----------------|-----------------|----------------|
|                               | In months 1-6   | In months 7-12  | In months 1-6   | In months 7-12 |
| Cycles                        | 1323/16687 (8%) | 1059/15107 (7%) | 1185/17119 (7%) | 64/719 (9%)    |
| Patients                      | 860/1894 (45%)  | 706/1764 (40%)  | 795/1939 (41%)  | 46/93 (49%)    |

## Supplementary Table 6: Cardiac Deaths Recorded in Clinical Record Forms

### 10 Cardiac Deaths recorded without metastatic disease

4 – Ischaemic heart disease – Unrelated / unlikely to be related

1 – LVEF decreased and CHF – Unrelated / unlikely to be related

1 – Acute heart failure / left ventricular hypertrophy and mitral valve disease – Unrelated / unlikely to be related

1 - Cardiac amyloid – Unrelated / unlikely to be related

1 - Cardiac sarcoid – Unrelated / unlikely to be related

1 - RV cardiomyopathy – Unrelated / unlikely to be related

1 – Death after routine CT scan – clinically anaphylaxis – no sign of this at post mortem – no cardiac pathology found.

### 3 deaths with metastatic disease were recorded as contributed to by cardiac problems

1 had controlled NYHA Type II CHF – Unrelated / unlikely to be related

1 had cardiomyopathy – Unrelated / unlikely to be related

1 had brain metastases and died during a seizure – Unrelated / unlikely to be related

| TNO  | Metastatic<br>Y/N | Treatment<br>Group | Trastuzumab<br>doses | Time from<br>diagnosis to<br>death<br>(months) | Cardiac causes                                                                  | Comment                                                                                                                                                                                                                                                                                                                                                                                                                                             |
|------|-------------------|--------------------|----------------------|------------------------------------------------|---------------------------------------------------------------------------------|-----------------------------------------------------------------------------------------------------------------------------------------------------------------------------------------------------------------------------------------------------------------------------------------------------------------------------------------------------------------------------------------------------------------------------------------------------|
| 144  | N                 | 12m                | 18                   | 44                                             | Ischaemic heart disease                                                         | Unrelated/Unlikely. Death due to acute MI 44 months after diagnosis. No plausible association between trastuzumab and coronary artery disease                                                                                                                                                                                                                                                                                                       |
| 938  | N                 | 12m                | 8                    | 21                                             | Ischaemic heart disease                                                         | Unrelated/Unlikely. Death due to acute MI 21 months after diagnosis. No plausible association between trastuzumab and coronary artery disease                                                                                                                                                                                                                                                                                                       |
| 1754 | N                 | 12m                | 18                   | 51                                             | Cardiac amyloid                                                                 | Unrelated - No plausible association between trastuzumab and amyloidosis                                                                                                                                                                                                                                                                                                                                                                            |
| 2003 | N                 | 12m                | 14                   | 29                                             | Cardiac sarcoid                                                                 | Unrelated - No plausible association between trastuzumab and sarcoidosis                                                                                                                                                                                                                                                                                                                                                                            |
| 3021 | N                 | 12m                | 18                   | 46                                             | Right Ventricular arrhythmic<br>cardiomyopathy                                  | Unlikely - Arrhythmic cardiomyopathy (ARVC in old terminology) has a known genetic basis (mostly desmosomal genes) with physiological triggers (e.g. extreme endurance sports). It is plausible that cardiac dysfunction caused by trastuzumab could have been a trigger but unlikely in this case as heart function had recovered long before the ARVC developed.                                                                                  |
| 3463 | N                 | 6m                 | 9                    | 53                                             | Acute heart failure / Left<br>ventricular hypertrophy /<br>mitral valve disease | Unrelated/unlikely - there is no known association with left ventricular hypertrophy or mitral valve disease and it's difficult to think of a mechanism for any effect months after the discontinuation of trastuzumab.                                                                                                                                                                                                                             |
| 35   | N                 | 6m                 | 9                    | 111                                            | Ischaemic heart disease                                                         | Unrelated/Unlikely. Death due to acute MI 111(!) months after diagnosis. No plausible association between trastuzumab and coronary artery disease                                                                                                                                                                                                                                                                                                   |
| 1051 | N                 | 6m                 | 4                    | 78                                             | CHF and type II respiratory<br>failure                                          | Unrelated/unlikely - Very unlikely to be related to trastuzumab - received only 4 doses, recovery of LV function >3 months after cessation, diagnosis of COPD, died 78 months after diagnosis                                                                                                                                                                                                                                                       |
| 1086 | N                 | 6m                 | 9                    | 43                                             | Not cardiac                                                                     | N/A                                                                                                                                                                                                                                                                                                                                                                                                                                                 |
| 2654 | N                 | 6m                 | 9                    | 41                                             | Myocardial infarction –<br>pulmonary embolism – atrial<br>myxoma                | Unrelated – no effect of trastuzumab during treatment, no association between trastuzumab and atrial myxoma or myocardial infarction                                                                                                                                                                                                                                                                                                                |
| 104  | Y                 | 12m                | 18                   | 39                                             | No cardiac problems – brain<br>metastases – died during a<br>seizure            | N/A                                                                                                                                                                                                                                                                                                                                                                                                                                                 |
| 625  | Y                 | 12m                | 3                    | 35                                             | Controlled NYHA II CHF                                                          | Death due to metastatic disease. LVEF recorded as 48% and trastuzumab stopped but no details of pre- LVEF or recovery of function so difficult to comment. An otherwise healthy woman unlikely to be symptomatic from an LVEF of 48% - was there something else going on? If she had symptomatic LV dysfunction this could have been caused by cancer treatment but an anthracycline effect is much more likely >1y after completion of trastuzumab |

|      |   |     |   |    |                |                                                                                                                                                                                                                                 |
|------|---|-----|---|----|----------------|---------------------------------------------------------------------------------------------------------------------------------------------------------------------------------------------------------------------------------|
| 1279 | Y | 12m | 4 | 75 | Cardiomyopathy | Clear effect of trastuzumab causing reduced LVEF during treatment but death 6 years later not plausibly related to trastuzumab. No supportive information for cardiomyopathy - no histology. Possibly related to anthracycline. |
|------|---|-----|---|----|----------------|---------------------------------------------------------------------------------------------------------------------------------------------------------------------------------------------------------------------------------|

**Supplementary Table 7: Adverse Events and Cardiac Monitoring, over the two 6-month periods, for the 44% patients randomised prior to starting Trastuzumab**

| Number of patients reporting at least one incidence of -                                             | 12-month group               |                              |                                           | 6-month group                |                              |                                          |
|------------------------------------------------------------------------------------------------------|------------------------------|------------------------------|-------------------------------------------|------------------------------|------------------------------|------------------------------------------|
|                                                                                                      | Overall                      | In months 1-6                | In months 7-12                            | Overall                      | In months 1-6                | In months 7-12                           |
| Adverse event with severe <sup>&amp;</sup> CTCAE grade SAR to trastuzumab <sup>§</sup>               | 231/855 (27%)<br>34/897 (4%) | 185/855 (22%)<br>22/897 (2%) | 121/791 (15%)<br>12/884 <sup>^</sup> (1%) | 195/852 (23%)<br>18/886 (2%) | 194/852 (23%)<br>17/886 (2%) | 2/44 (5%)<br>2/870 <sup>^</sup> (0.2%)   |
| Clinical cardiac dysfunction <sup>#</sup><br>Stopped trastuzumab permanently due to cardiac toxicity | 103/872 (12%)<br>75/855 (9%) | 73/872 (8%)<br>33/855 (4%)   | 76/857 (9%)<br>42/791 (5%)                | 65/870 (7%)<br>32/852 (4%)   | 51/870 (6%)<br>31/852 (4%)   | 42/833 (5%)<br>1/44 (2%)                 |
| Cardiac death †<br>Cardiac death related to trastuzumab †                                            | 4/897<br>0/897               | 0/897<br>0/897               | 0/884 <sup>^</sup><br>0/884 <sup>^</sup>  | 3/886<br>0/886               | 0/886<br>0/886               | 0/870 <sup>^</sup><br>0/870 <sup>^</sup> |
| Low LVEF *<br>Significant falls in LVEF                                                              | 114/895 (13%)                | 69/895 (8%)                  | 80/857 (9%)                               | 86/888 (10%)                 | 73/888 (8%)                  | 39/776 (5%)                              |
| Absolute decrease of ≥10% from baseline to <50%<br>LVEF<50% after a baseline of ≥59%                 | 84/869 (10%)<br>58/869 (7%)  | 48/865 (6%)<br>30/865 (3%)   | 59/834 (7%)<br>43/834 (5%)                | 64/857 (7%)<br>47/857 (5%)   | 50/855 (6%)<br>38/855 (4%)   | 28/755 (4%)<br>19/755 (3%)               |

<sup>&</sup> CTCAE grade ≥3, or 2 for palpitations

<sup>§</sup> Denominators exclude the 3 patients known not to have received Trastuzumab

<sup>^</sup> Denominators reduced due to either deaths or withdrawal of consent for follow-up within the 1<sup>st</sup> 6 months.

<sup>#</sup> Clinical cardiac dysfunction = Symptoms of cardiac disease, and / or signs of congestive heart failure and / or new medication for cardiac disease

<sup>†</sup> 7 deaths were reported to have a 'cardiac' cause, either first cause or contributory. None occurred during the first 12 months after starting trastuzumab treatment. 6 patients died with no metastatic disease, and 1 had metastatic disease. In all cases trastuzumab was judged to be unrelated / unlikely to be related to cardiac problems

\* Low LVEF = Number of patients with at least one LVEF<50%, or LVEF % unknown but classified on report as abnormal

Abbreviations:

SAR – Serious Adverse Reaction

LVEF = Left Ventricular Ejection Fraction

Figures

**Supplementary Figure 1: Forest plots of Overall Survival for all patients (Panel A) and adjuvant only patients (Panel B)**

a) OS – all patients

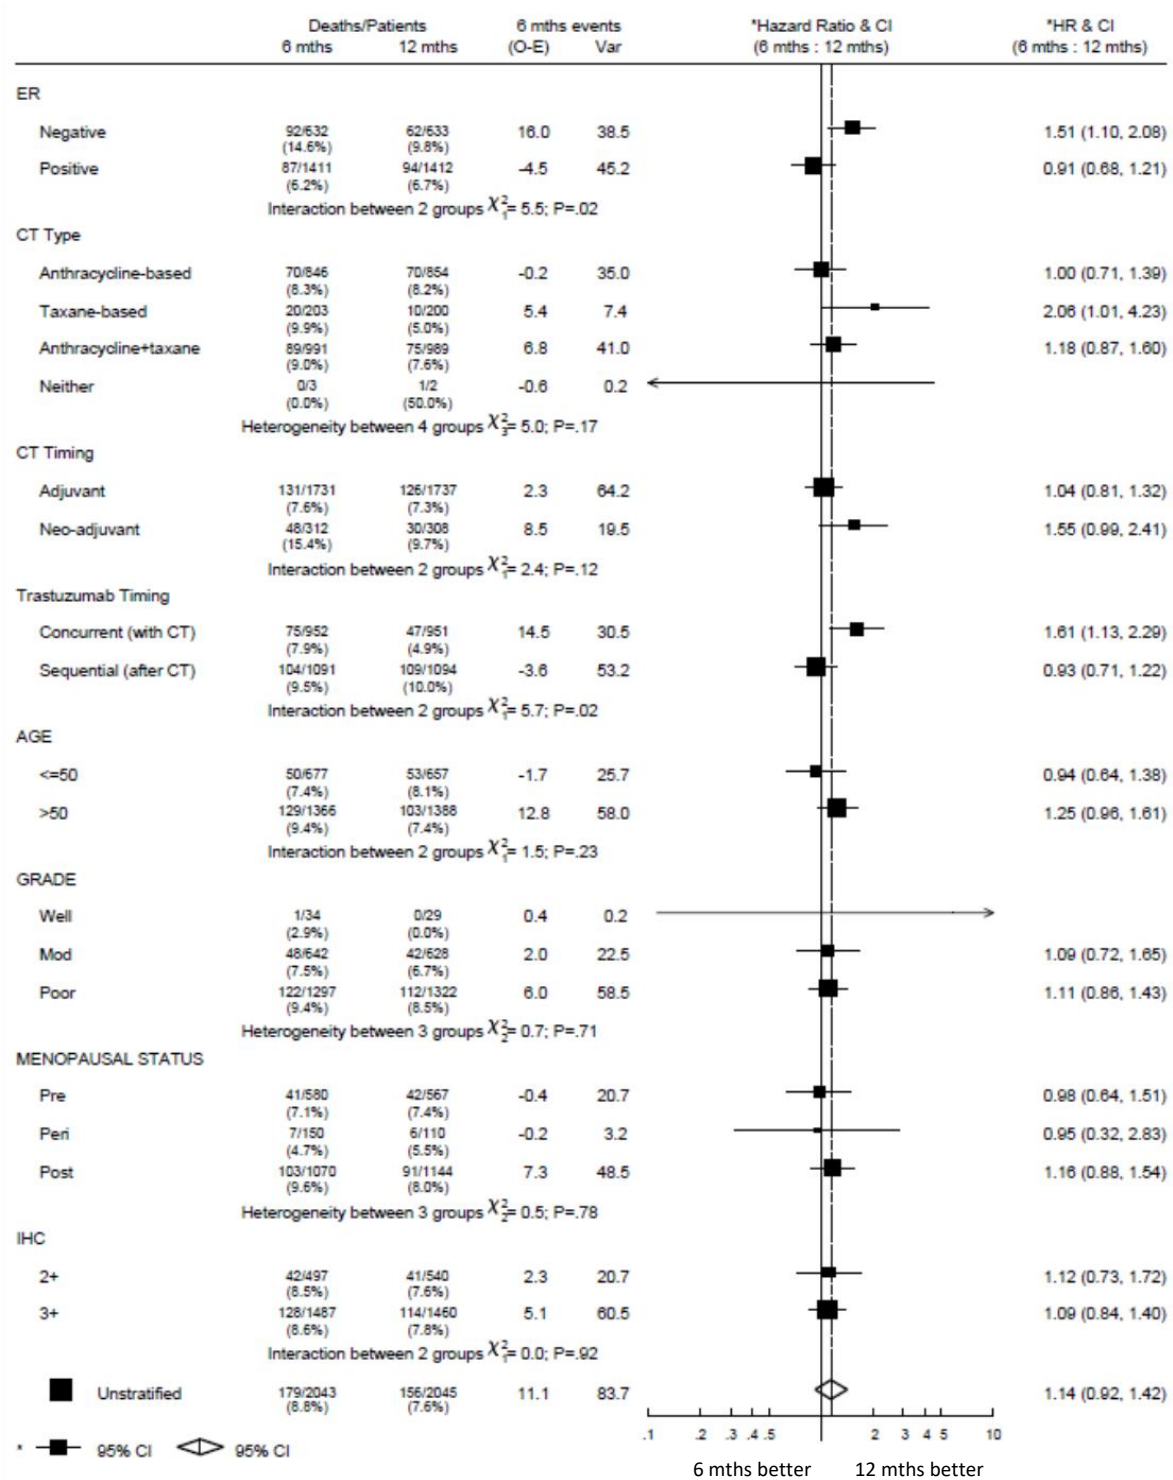



b) OS – adjuvant patients only

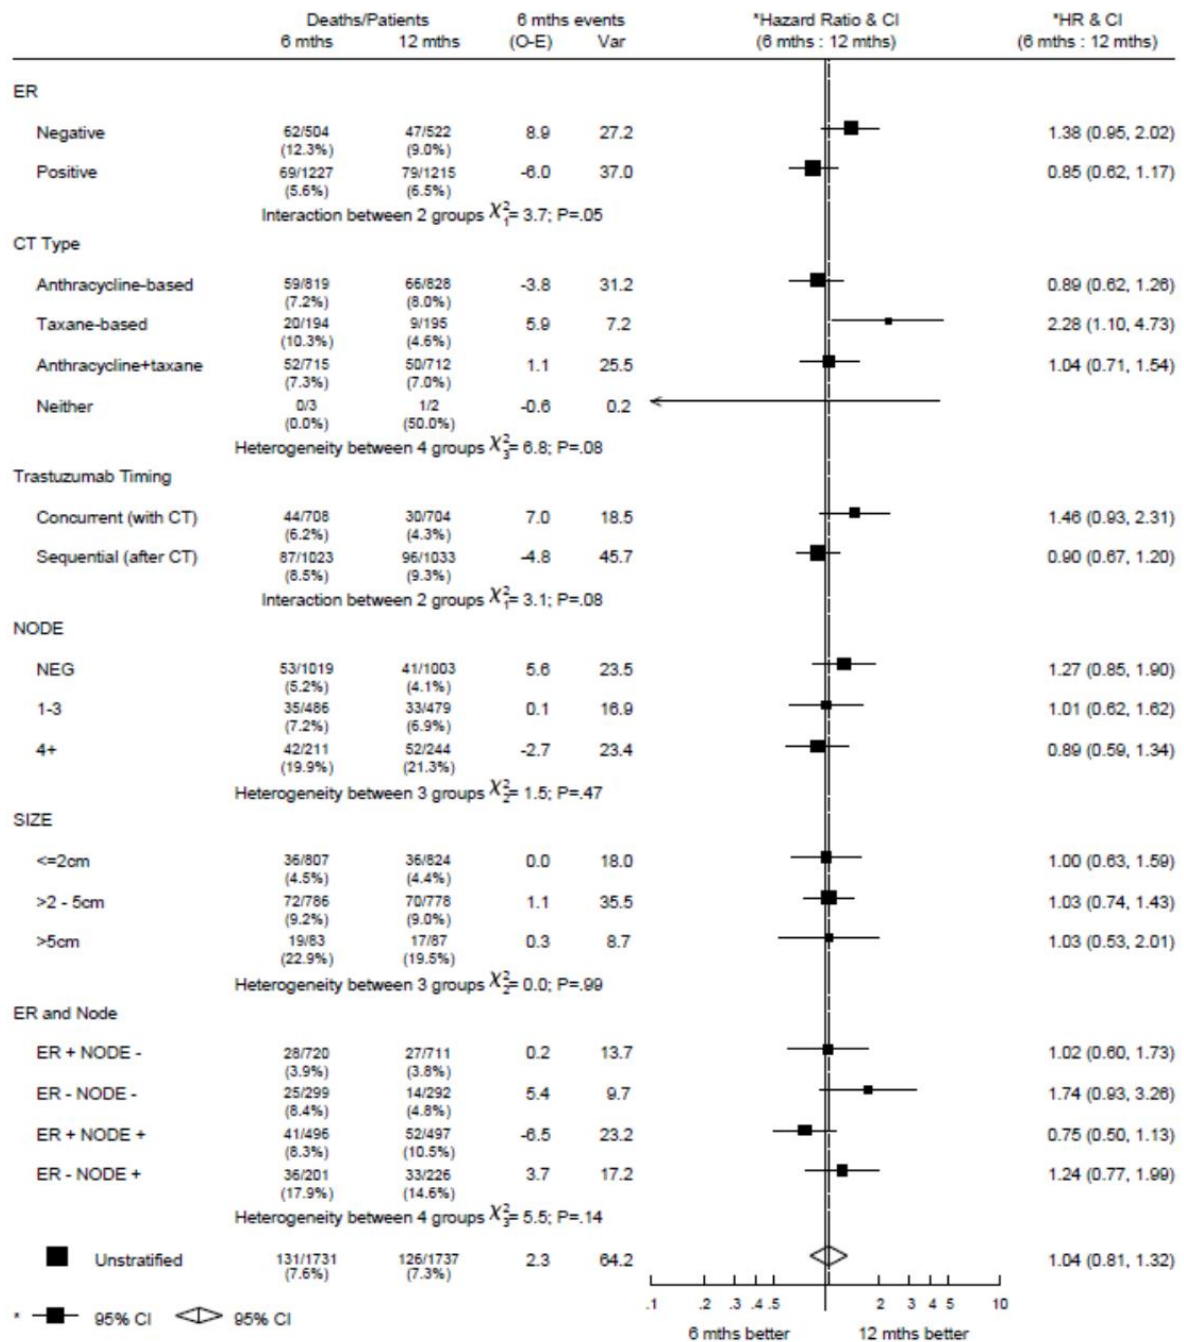

**Supplementary Figure 2: Forest plots of Landmark Disease-Free Survival (Panel A for all patients, Panel B for adjuvant patients only) and landmark Overall Survival (Panel C for all patients, Panel D for adjuvant patients only)**

a) Landmark DFS – all patients

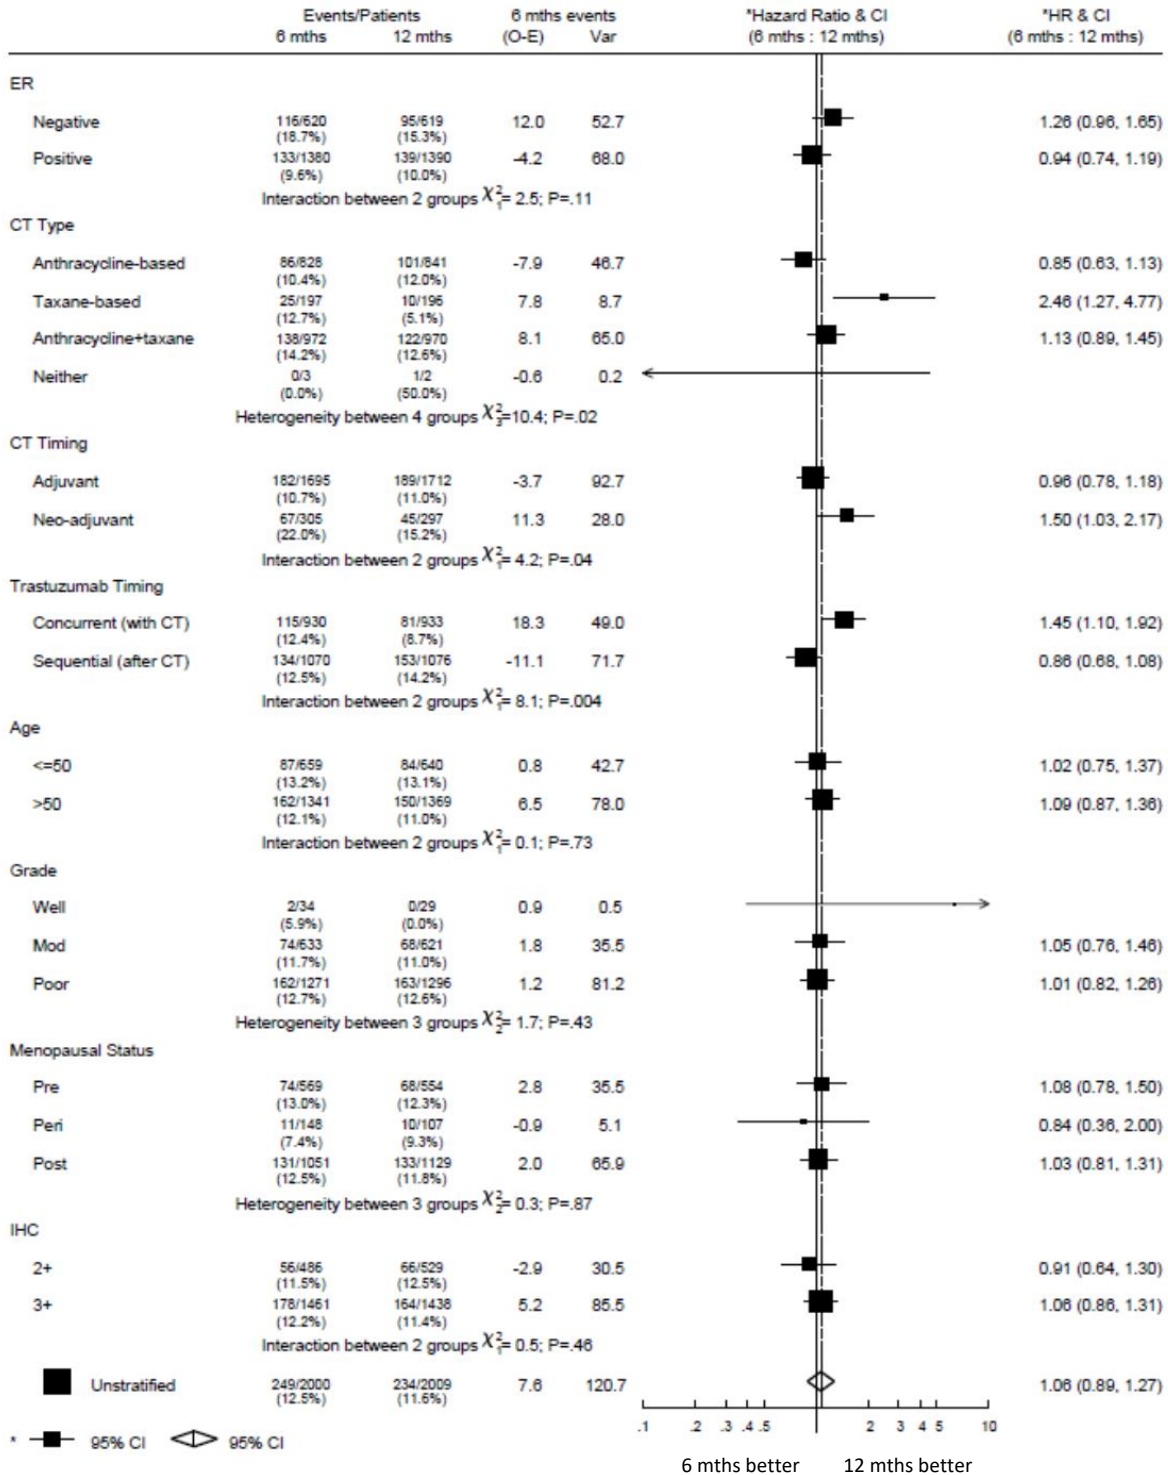

b) Landmark DFS – adjuvant patients only

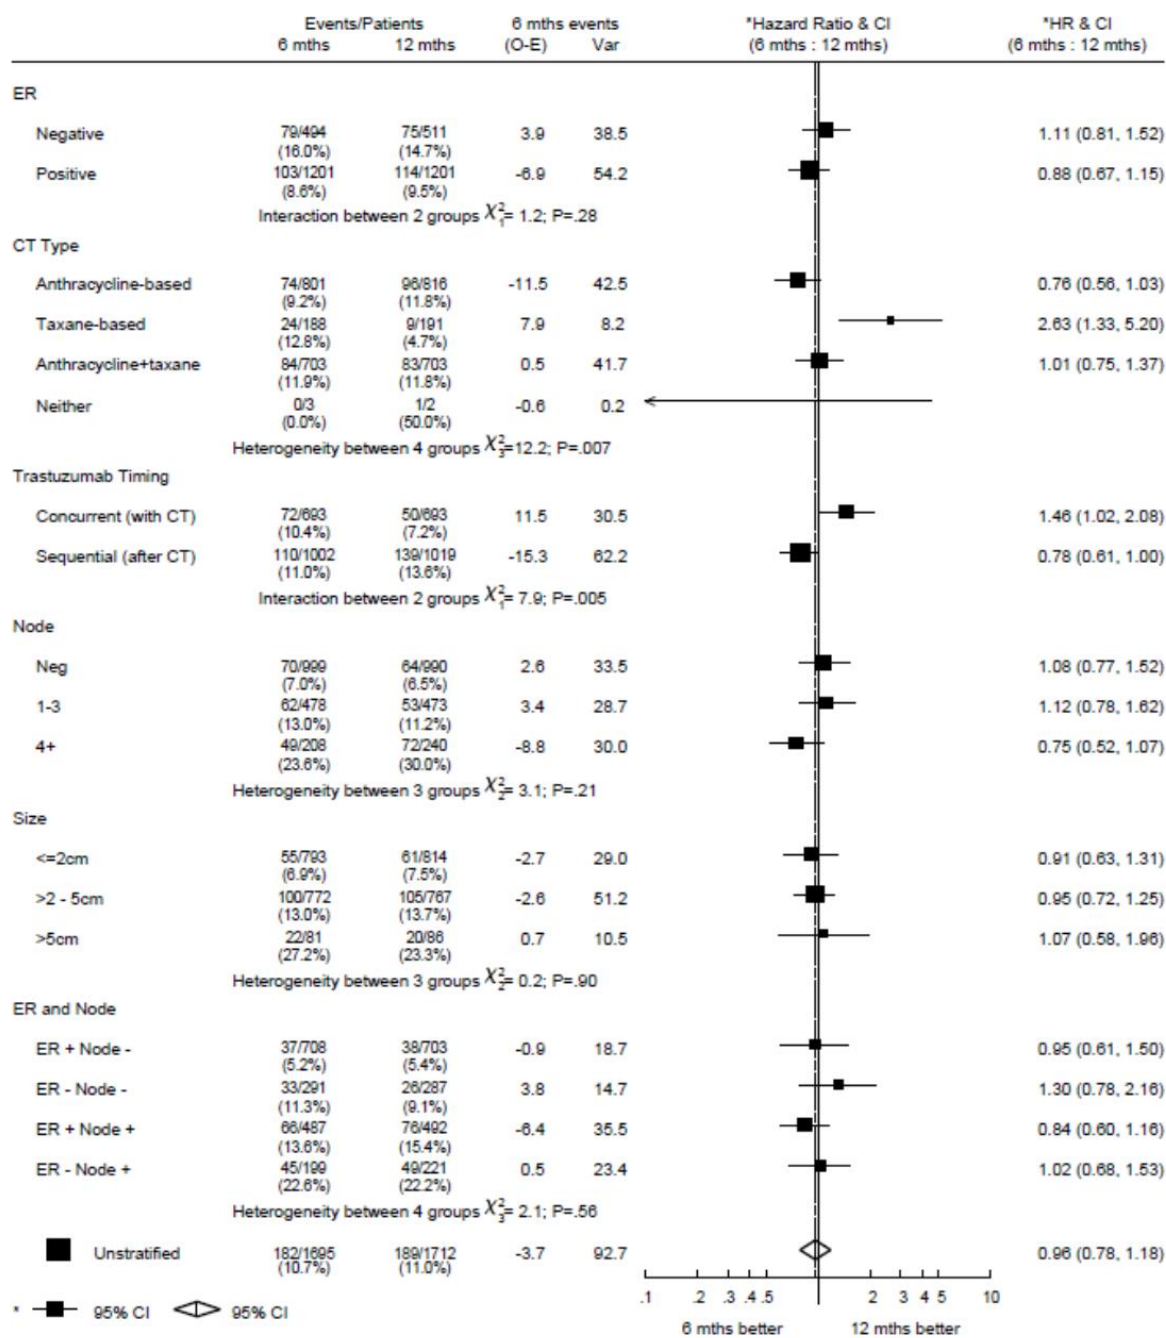

c) Landmark OS – all patients

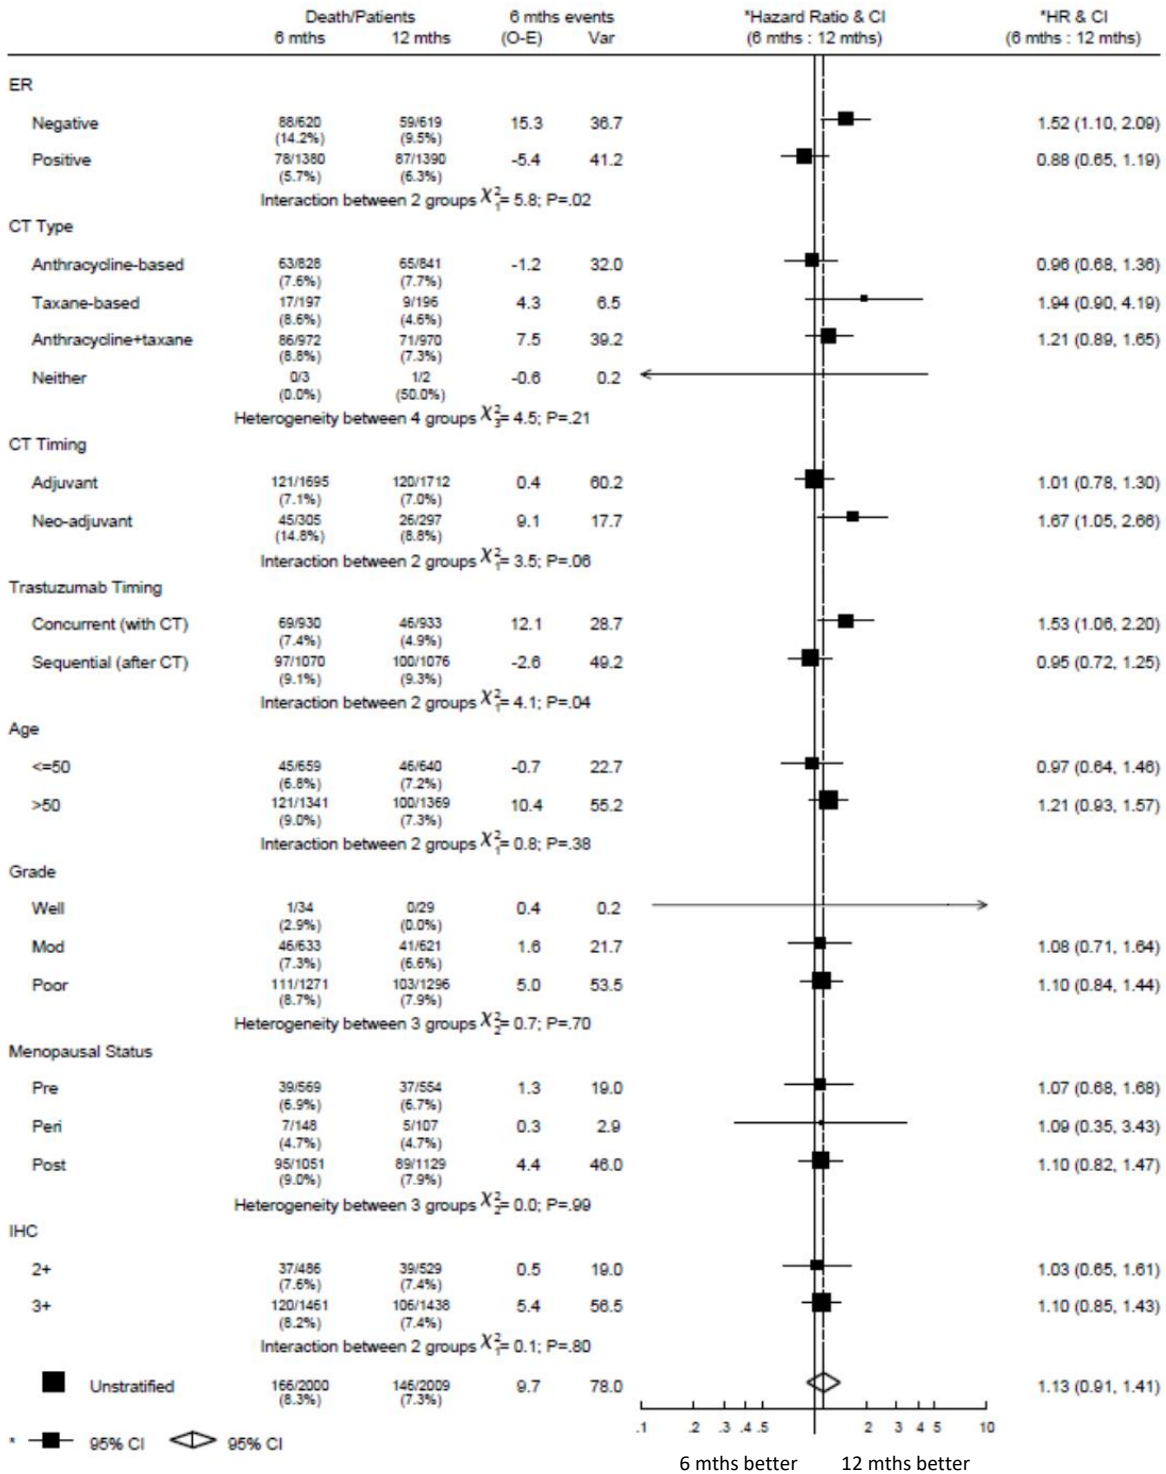

d) Landmark OS – adjuvant patients only

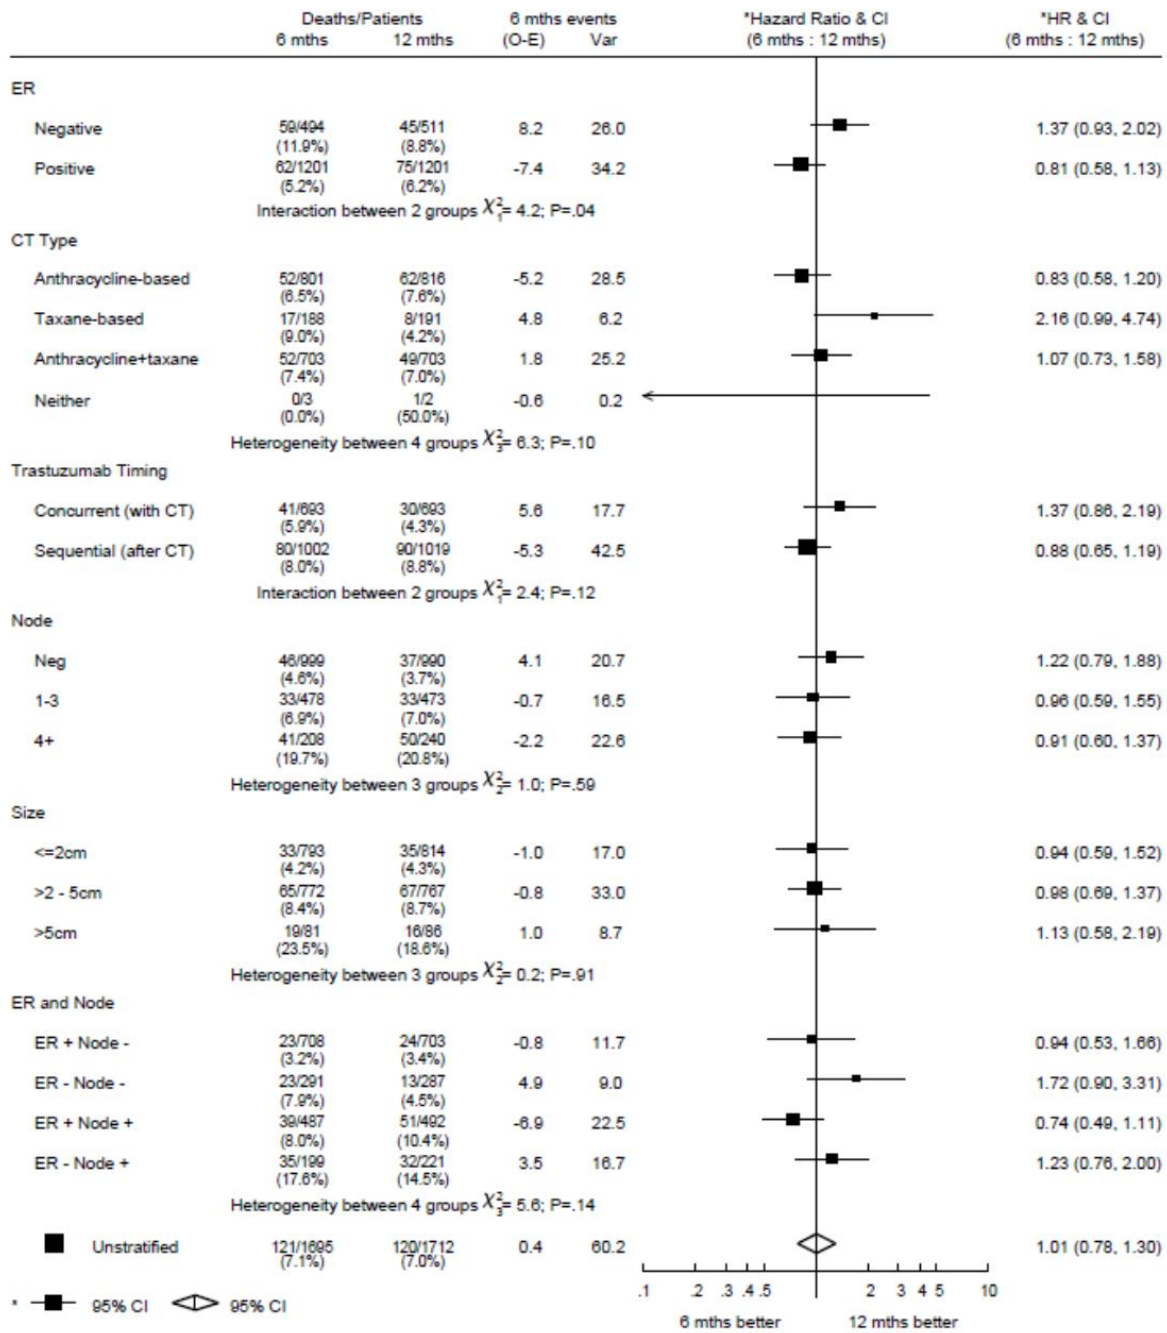

Supplementary Figure 3: Patients reporting an Adverse Event of severe grade (CTCAE ≥ 3, or 2 for palpitations)

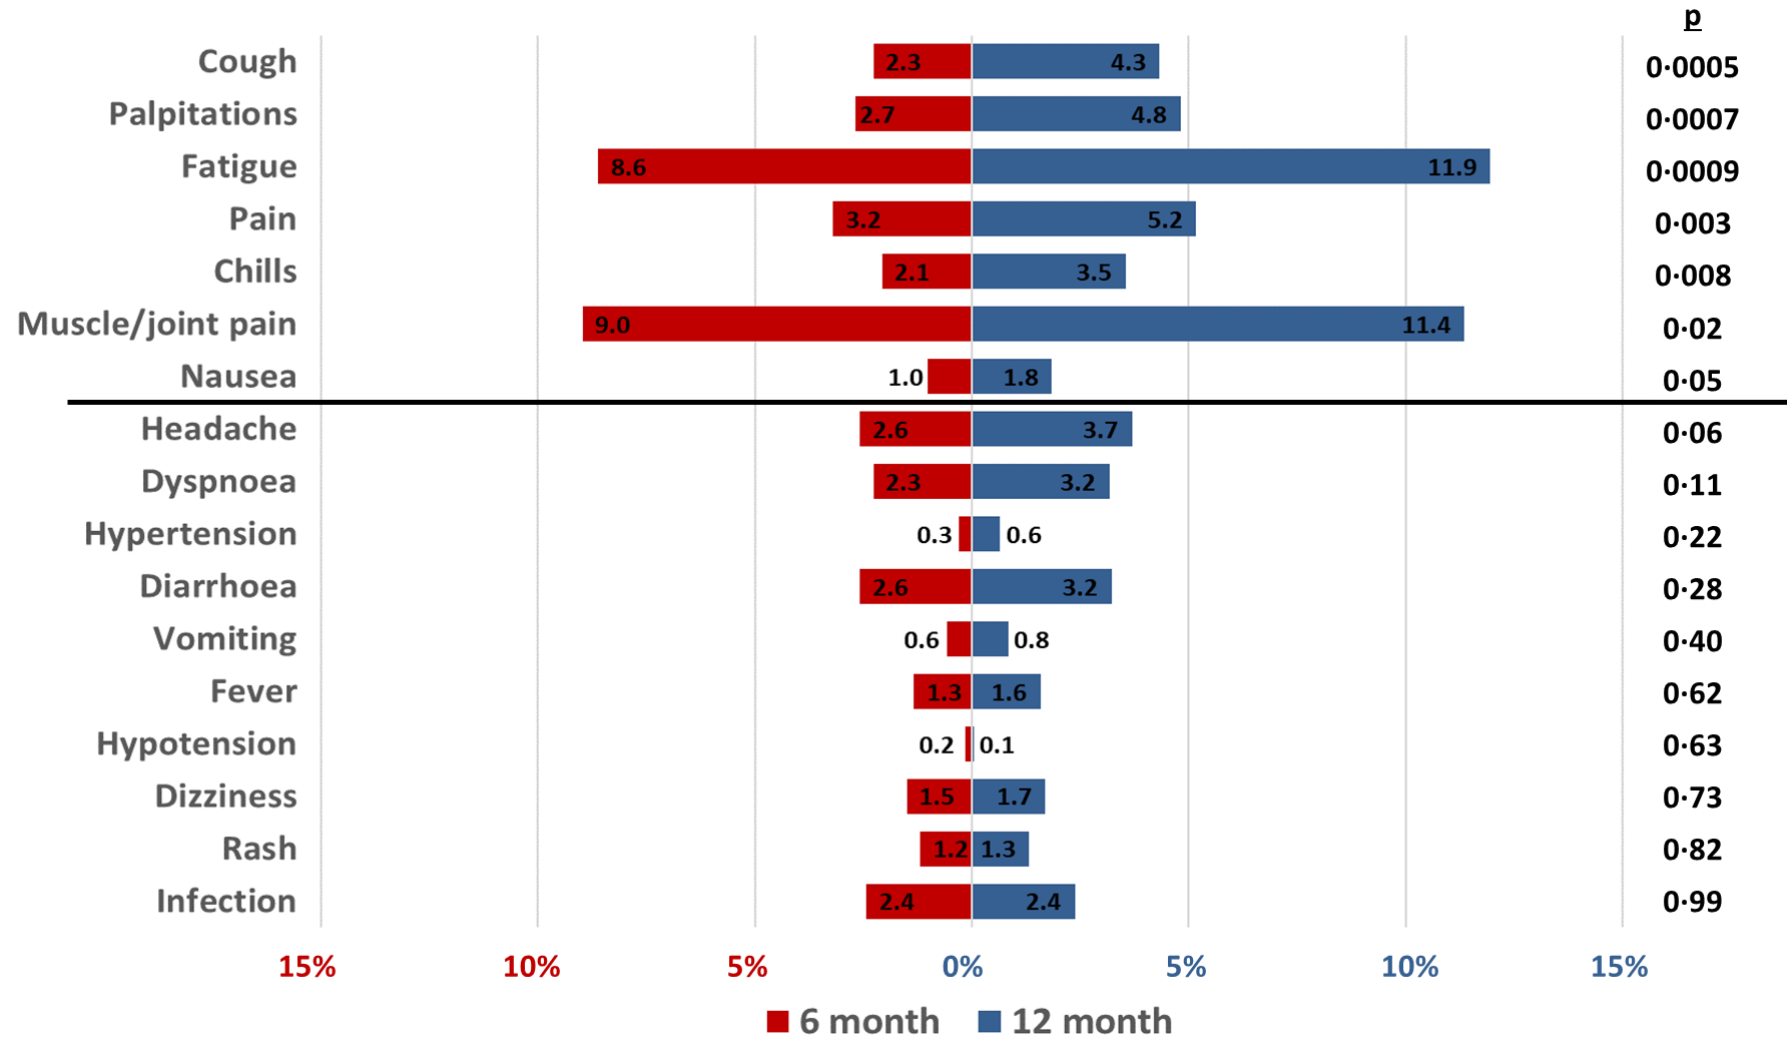

**Supplementary Figure 4: Quality of Life over time; General Health (Panel A) and EQ-5D-3L Visual Analogue Scale (Panel B)**

(A)

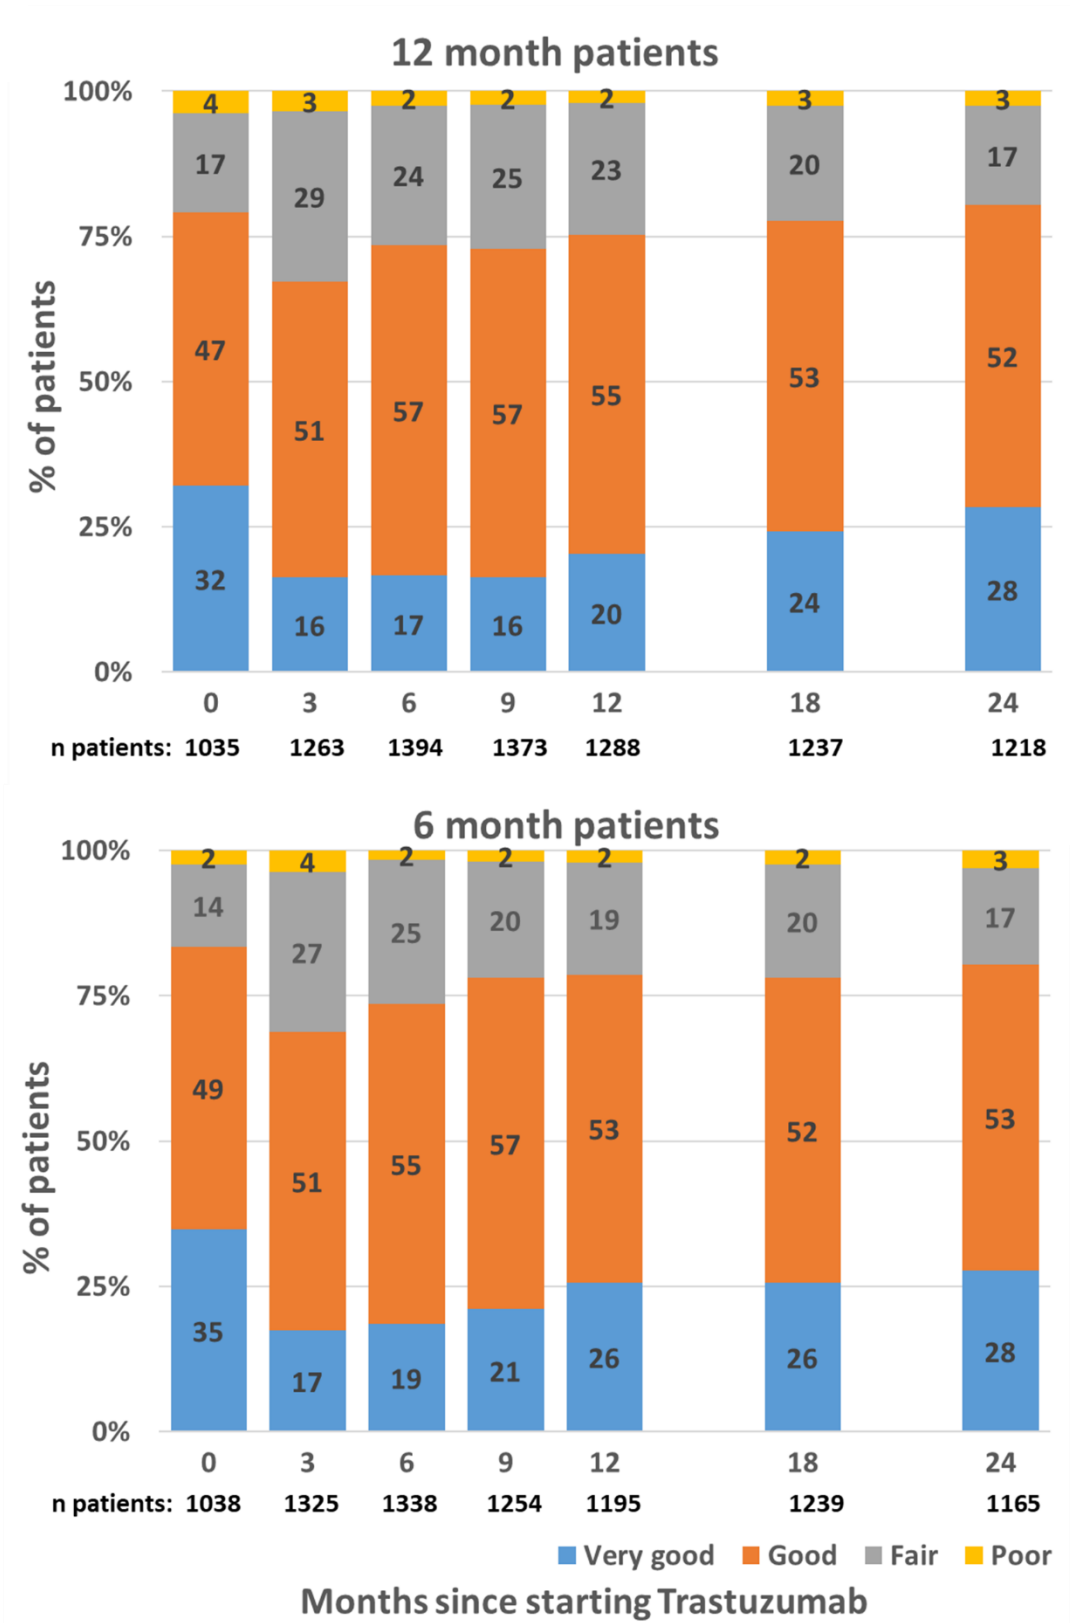

(B)

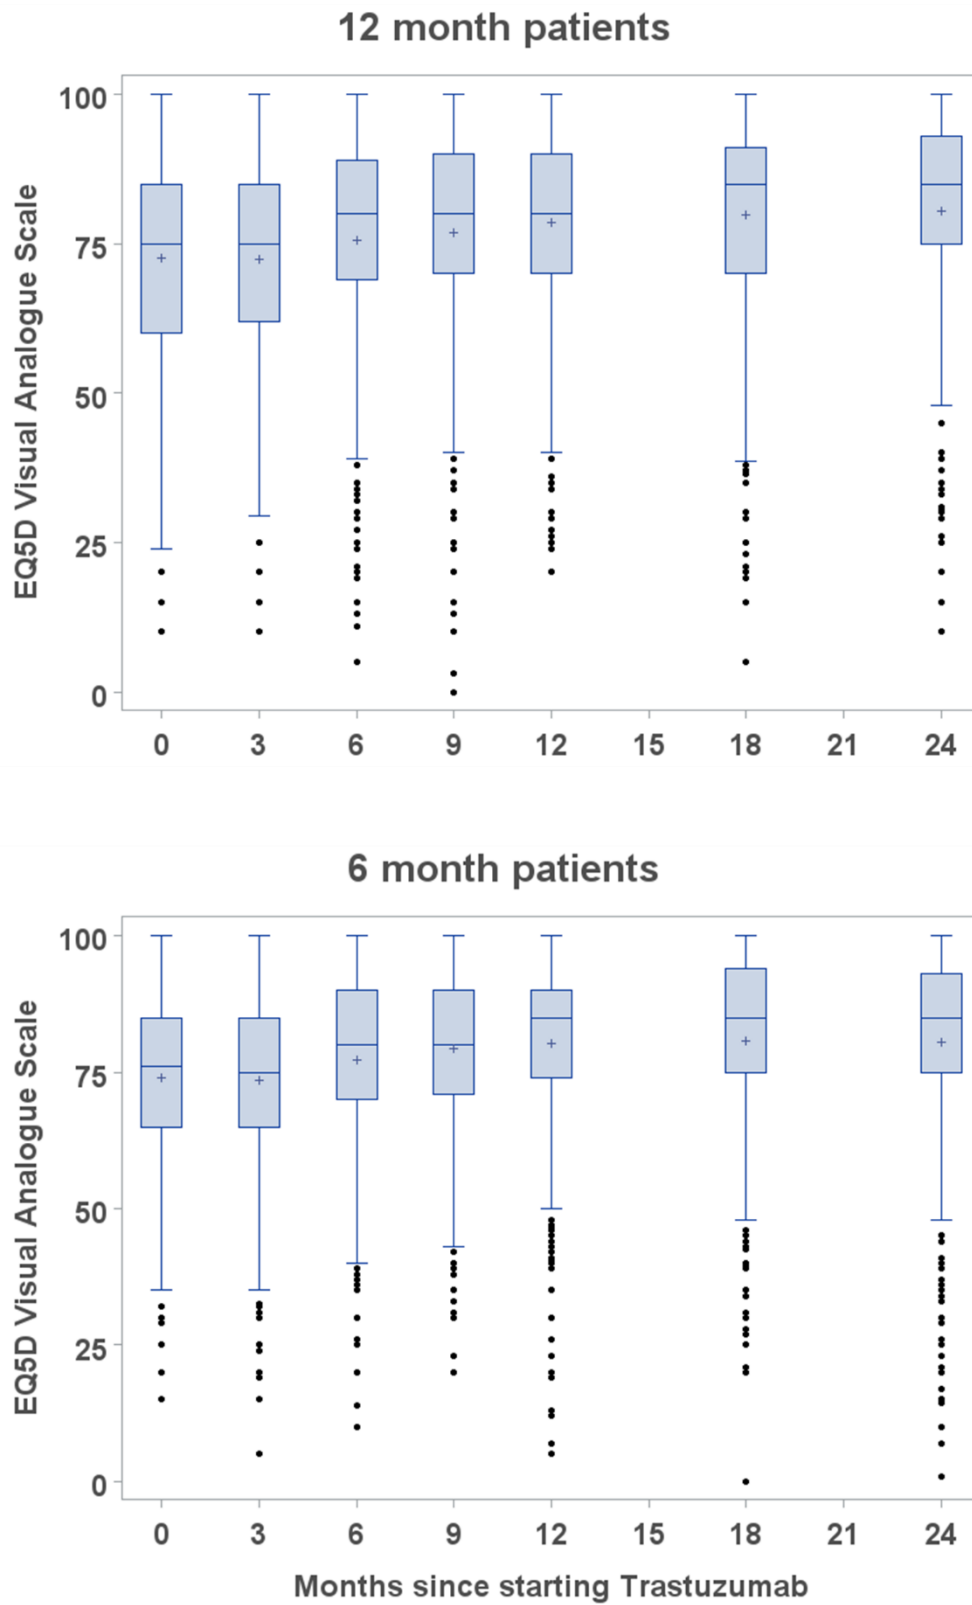



## Contributors

### Committee Members

| <b>Data Monitoring and Safety Committee</b> |                    |
|---------------------------------------------|--------------------|
| First Name                                  | Last Name          |
| Marianne                                    | Nicolson           |
| Richard                                     | Bell               |
| Roger                                       | Ahern              |
| <b>Independent Steering Committee</b>       |                    |
| Adele                                       | Francis (deceased) |
| Richard                                     | Gray               |
| Tim                                         | Maughan            |
| <b>Steering Committee</b>                   |                    |
| <u>Lead Investigators</u>                   |                    |
| Helena                                      | Earl               |
| David                                       | Miles              |
| David                                       | Cameron            |
| Andrew                                      | Wardley            |
| <u>Clinical Co-ordinators</u>               |                    |
| Rajiv                                       | Agrawal            |
| Rozenn                                      | Allerton           |
| Peter                                       | Bliss              |
| Carlos                                      | Caldas             |
| Peter                                       | Canney             |
| Stephen                                     | Chan               |
| Michael                                     | Crawford           |
| Sue                                         | Dean               |
| Christopher                                 | Gallagher          |
| Rosalind                                    | Glasspool          |
| Adrian,                                     | Harnett            |
| Tamas                                       | Hickish            |
| Steve                                       | Houston            |
| Luke                                        | Hughes-Davies      |
| Alison                                      | Jones              |
| Robert                                      | Leonard            |
| Michael                                     | Lind               |
| Andreas                                     | Makris             |
| Karen                                       | McAdam             |
| Janine                                      | Mansi              |
| Susan                                       | O'Reilly           |
| Ann                                         | Robinson           |
| Timothy                                     | Perren             |
| Pippa                                       | Riddle             |
| Diana                                       | Ritchie            |
| Peter                                       | Simmonds           |
| Mark                                        | Verrill            |
| Charles                                     | Wilson             |
| <u>Clinical surgical co-ordinators</u>      |                    |
| Gordon                                      | Wishart            |
| Anthony                                     | Skene              |
| <u>Cardiology Advisor</u>                   |                    |
| David                                       | Dutka              |
| <u>Protocol authors</u>                     |                    |
| Helena                                      | Earl               |
| Anne-Laure                                  | Vallier            |
| Janet                                       | Dunn               |

|                                                                    |         |
|--------------------------------------------------------------------|---------|
| Louise                                                             | Hiller  |
| Chris                                                              | McCabe  |
| <u>Statisticians</u>                                               |         |
| Janet                                                              | Dunn    |
| Louise                                                             | Hiller  |
| <u>Trial Co-ordinators</u>                                         |         |
| Shrushma                                                           | Loi     |
| Anne-Laure                                                         | Vallier |
| Linda                                                              | Jones   |
| <u>Pharmacovigilance</u>                                           |         |
| Helena                                                             | Earl    |
| Anne-Laure                                                         | Vallier |
| <u>Health Economics Advisor</u>                                    |         |
| Christopher                                                        | McCabe  |
| <u>Phase III co-ordinating centre</u>                              |         |
| Warwick Medical School Clinical Trials Unit, University of Warwick |         |
| <u>Translational Sub-committee</u>                                 |         |
| Carlos                                                             | Caldas  |
| <u>PHARE Group France</u>                                          |         |
| Xavier                                                             | Pivot   |

Contributing sites and consultants

| <b>Randomising Site</b>                   | <b>Randomising Consultant</b>                                                                                                                                                                                                                                  |
|-------------------------------------------|----------------------------------------------------------------------------------------------------------------------------------------------------------------------------------------------------------------------------------------------------------------|
| Aberdeen Royal Infirmary                  | Dr A Radha Todd, Dr Ravi Sharma, Dr Trevor McGoldrick                                                                                                                                                                                                          |
| Addenbrooke's Hospital                    | Dr Charles Wilson, Dr Elizabeth Cox, Dr Jean Abraham, Dr Karen McAdam, Dr Luke Hughes-Davies                                                                                                                                                                   |
| Airedale General Hospital                 | Dr Chris Bradley, Dr Shazza Rehman                                                                                                                                                                                                                             |
| Alexandra Hospital                        | Dr Clive Irwin                                                                                                                                                                                                                                                 |
| Ashford Hospital                          | Dr May Teoh                                                                                                                                                                                                                                                    |
| Barnet Hospital                           | Dr Kin Woo, Dr Peter Ostler, Dr Rob Stein                                                                                                                                                                                                                      |
| Barnsley District Hospital                | Dr Bernadette Birtwhistle, Dr Caroline Lee, Dr Lucy Walkington                                                                                                                                                                                                 |
| Basildon and Thurrock University Hospital | Dr Helen Swinburn, Dr Naveed Sarwar, Dr Wendy Ella                                                                                                                                                                                                             |
| Basingstoke and North Hampshire Hospital  | Dr Felicity Ross, Dr Sandra Tinkler                                                                                                                                                                                                                            |
| Bedford General Hospital                  | Dr Robert Thomas, Dr Sarah Smith                                                                                                                                                                                                                               |
| Birmingham Heartlands Hospital            | Dr Indrajit Fernando                                                                                                                                                                                                                                           |
| Bishop Auckland General Hospital          | Dr Nicolas J Wadd                                                                                                                                                                                                                                              |
| Blackpool Victoria Hospital               | Dr Andrew Hindley, Dr Falalu Danwata, Dr Pavel Bezecny, Dr Shabbir Susnerwala                                                                                                                                                                                  |
| Borders General Hospital                  | Dr Carolyn Bedi                                                                                                                                                                                                                                                |
| Bradford Royal Infirmary                  | Dr Chris Bradley, Dr Shazza Rehman                                                                                                                                                                                                                             |
| Broomfield Hospital                       | Dr Udaiveer Panwar, Dr Vivienne Loo, Prof Neville Davidson                                                                                                                                                                                                     |
| Castle Hill Hospital                      | Dr Amandeep Dhadda, Dr Georgios Bozas, Dr Penny O'Neill, Dr Saiqa Spensley, Dr Sunil Upadhyay, Prof Michael Lind                                                                                                                                               |
| Charing Cross Hospital                    | Dr Andrea Zivi, Dr Carlo Palmieri, Dr Charles Lowdell, Dr Conrad Lewanski, Dr Constantine Alifrangis, Dr Hanine Medani, Dr Laura Kenny, Dr Matthew Flook, Dr Sean O'Cathail, Dr Susan Cleator, Prof Charles Coombes, Prof Justin Stebbing, Prof Robert Leonard |
| Cheltenham General Hospital               | Dr Jo Bowen, Dr Kim Benstead, Dr Peter Jenkins, Dr Radhika Counsell, Dr Roger Owen, Dr Sean Elyan                                                                                                                                                              |
| Chesterfield Royal Hospital               | Dr Omar Din                                                                                                                                                                                                                                                    |
| Christie Hospital                         | Dr Abbas Chittalia, Dr Andrew Wardley, Dr Anne Armstrong, Dr Helen Mitchell, Dr Juliette Loncaster, Dr Sasha Howell                                                                                                                                            |
| City Hospital                             | Dr Daniel Rea, Dr David Spooner                                                                                                                                                                                                                                |
| Clatterbridge Centre for Oncology         | Dr Allison Hall, Dr Douglas Errington, Dr Farida Alam, Dr Khizar Hayat, Dr Susan O'Reilly, Dr Zafar Malik                                                                                                                                                      |
| Conquest Hospital,                        | Dr Craig Knighton, Dr Gillian Sadler                                                                                                                                                                                                                           |
| County Hospital                           | Dr Sam Guglani                                                                                                                                                                                                                                                 |
| Cumberland Infirmary                      | Dr Paul Dyson, Ms Helen Roe                                                                                                                                                                                                                                    |
| Darent Valley Hospital                    | Dr Andrew Visioli, Dr Catherine Harper-Wynne, Dr Julia Hall                                                                                                                                                                                                    |

|                                        |                                                                                                                  |
|----------------------------------------|------------------------------------------------------------------------------------------------------------------|
| Darlington Memorial Hospital           | Dr Alison Humphreys, Dr John Hardman, Dr Sophie Haney                                                            |
| Dewsbury and District Hospital         | Dr Jay Naik                                                                                                      |
| Diana, Princess of Wales Hospital      | Dr Mohammad Butt, Dr Sunil Upadhyay                                                                              |
| Doncaster Royal Infirmary              | Dr Kathleen Dunn, Dr Sundareswaran Ramakrishnan                                                                  |
| Dorset County Hospital                 | Dr Amitabha Chakrabarti, Dr Perric Crellin, Dr Susan Dean                                                        |
| Dumfries and Galloway Royal Infirmary  | Dr Carolyn Bedi, Dr Marjory MacLennan, Dr Tamasin Evans                                                          |
| Ealing Hospital                        | Dr Conrad Lewanski                                                                                               |
| East Surrey Hospital                   | Dr Alexander Lee, Dr Eirini Thanopoulou, Dr Stephen Houston                                                      |
| Eastbourne District General Hospital   | Dr Alistair Ring, Dr Charlotte Moss, Dr Sarah Westwell                                                           |
| Essex County Hospital                  | Dr Devy Basu, Dr Philip Murray, Dr Vivienne Loo                                                                  |
| Freeman Hospital                       | Dr Mark Verrill                                                                                                  |
| Friarage Hospital                      | Dr Hans Van der Voet, Dr Sarah Lawless                                                                           |
| Furness General Hospital               | Dr Geraldine Skailes, Dr Sarah Moon                                                                              |
| George Eliot Hospital                  | Dr Lydia Fresco, Dr Medy Tsalic, Dr Susan Lupton                                                                 |
| Glan Clwyd Hospital                    | Dr Catherine Bale, Dr Jill Bishop, Dr Win Soe                                                                    |
| Good Hope Hospital                     | Dr Andrea Stevens, Dr Medy Tsalic                                                                                |
| Great Western Hospital                 | Dr Anne Kendall, Dr David Cole, Dr Kinnari Patel, Dr Shiroma De Silva-Minor                                      |
| Guy's Hospital                         | Dr Eleni Karapanagiotou, Dr Janine Mansi, Dr Mark Harries, Dr Paul Ellis, Dr Sarah Harris                        |
| Halton General Hospital                | Prof Peter Clark                                                                                                 |
| Hexham General Hospital                | Dr Anthony N Branson                                                                                             |
| Hinchingbrooke Hospital                | Dr Cheryl Palmer, Dr Clary Evans, Dr Simon Russell                                                               |
| Ipswich Hospital                       | Dr Karen E Sherwin, Dr Ramachandran Venkitaraman                                                                 |
| James Paget Hospital                   | Dr Adrian Harnett, Dr May Thu Han                                                                                |
| Kent and Canterbury Hospital           | Dr Carys Thomas, Dr Julia Hall, Dr Natasha Mithal                                                                |
| Kidderminster Hospital                 | Dr Mark Churn                                                                                                    |
| King Edward VII Hospital               | Dr Narottam Thanvi, Dr Ruth Davis                                                                                |
| King's College Hospital                | Dr Anne Rigg, Dr Fiona Castell, Dr Vasiliki Michalarea                                                           |
| King's Mill Hospital                   | Dr Sarah Khan, Dr Victoria Brown                                                                                 |
| Leighton Hospital                      | Dr Laura Horsley                                                                                                 |
| Lincoln County Hospital                | Dr Abhro Chaudhuri, Dr Elisabeth Murray, Dr Thiagarajan Sreenivasan                                              |
| Lister Hospital                        | Dr Nihal Shah                                                                                                    |
| Luton and Dunstable Hospital           | Dr Mei-Lin Ah-See                                                                                                |
| Macclesfield District General Hospital | Dr Lisa Barraclough, Dr Mark Lawrence                                                                            |
| Maidstone Hospital                     | Dr Catherine Harper-Wynne, Dr Charlotte Abson, Dr Rema Jyothirmayi, Dr Russell Burcombe                          |
| Manor Hospital                         | Dr Indrajit Fernando, Dr Suhail Anwar                                                                            |
| Medway Maritime Hospital               | Dr Charlotte Abson, Dr Maher Hadaki                                                                              |
| Milton Keynes Hospital                 | Dr Hany Eldeeb, Dr Maria Karina, Dr S. Azhar Rizvi                                                               |
| Mount Vernon Hospital                  | Dr Amy Guppy, Dr Andreas Makris, Dr Arshi Denton, Dr David Miles, Dr Peter Ostler, Prof Jane Maher               |
| Musgrove Park Hospital                 | Dr Emma Cattell, Dr Hilary Barlow, Dr John Graham, Dr Mohini Varughese, Dr Saiqa Spensley                        |
| Nevill Hall Hospital                   | Dr Nayyer Iqbal, Dr Simon Waters, Dr Theresa Howe                                                                |
| New Cross Hospital                     | Dr Caroline Brammer, Dr Georgi Georgiev, Dr Laura Pettit, Dr Mark Churn, Dr Prakash Ramachandra, Dr Rakesh Mehra |
| Newham General Hospital                | Dr Chris Gallagher, Dr Karen Tipples, Dr Virginia Wolstenholme                                                   |
| Norfolk & Norwich University Hospital  | Dr Adrian Harnett, Dr Andrew Bulman, Dr Daniel Epurescu, Dr Dinos Geropantas, Dr Susanna Alexander               |
| North Devon District Hospital          | Dr Kate Scatchard                                                                                                |
| North Middlesex Hospital               | Dr Fharat Raja, Dr Jacqueline Newby, Dr Stephen Karp                                                             |
| North Tyneside General Hospital        | Dr Anthony N Branson                                                                                             |
| Northampton General Hospital           | Dr Craig Knighton, Dr Craig Macmillan, Dr Hany Eldeeb                                                            |
| Northwick Park Hospital                | Dr Andreas Makris, Dr Arshi Denton                                                                               |
| Nottingham City Hospital               | Dr Sarah Khan, Dr Stephen Chan                                                                                   |
| Peterborough City Hospital             | Dr Catherine Jephcott, Dr Karen McAdam, Dr Sarah Ayers                                                           |
| Pilgrim Hospital                       | Dr Chiara Intrivici, Dr Elisabeth Murray                                                                         |
| Pinderfields Hospital                  | Dr Jay Naik                                                                                                      |
| Poole Hospital                         | Dr Amitabha Chakrabarti, Dr Darcy Goode, Dr Joanne Brady, Dr Susan Dean                                          |
| Prince Charles Hospital                | Dr Helen Passant                                                                                                 |

|                                                   |                                                                                                                                                           |
|---------------------------------------------------|-----------------------------------------------------------------------------------------------------------------------------------------------------------|
| Princess of Wales Hospital                        | Dr James Powell, Dr Rosie Stevens                                                                                                                         |
| Princess Royal University Hospital                | Dr Elinor Sawyer, Dr Mark Harries                                                                                                                         |
| Queen Alexandra Hospital                          | Dr Caroline Archer, Dr Helen Cooper, Dr Joanna Gale, Dr Timothy Gulliford                                                                                 |
| Queen Elizabeth Hospital (Birmingham)             | Dr Andrea Stevens, Dr Daniel Rea, Dr Suhail Anwar                                                                                                         |
| Queen Elizabeth Hospital (Gateshead)              | Dr Daniela Lee, Dr Goudarz Mazdai, Dr Helen Lucraft, Dr Helen Turnbull, Dr Nicola Cresti, Dr Prithvi Jampana, Dr Rebecca Goranova, Dr Wendy Taylor        |
| Queen Elizabeth Hospital (King's Lynn)            | Dr Athar Ahmad, Dr Ellen Gokkel, Dr Margaret Daly, Dr Nicola Ainsworth, Dr Shahzeena Aslam,                                                               |
| Queen Elizabeth Hospital (London)                 | Dr Bruce Bryant, Dr Hartmut Kristeleit, Dr Mark Harries                                                                                                   |
| Queen Elizabeth The Queen Mother Hospital         | Dr Carys Thomas, Dr Jane Brown, Dr Julia Hall, Dr Natasha Mithal, Dr Rohit Malde                                                                          |
| Queen's Hospital (Burton)                         | Dr Ad Chetiyawardana, Dr Mojca Persic                                                                                                                     |
| Queen's Hospital (Romford)                        | Dr Anwar Al-Saffar, Dr Caroline Bridgewater, Dr Eliot Sims, Dr Elizabeth Croydon, Dr Emma Staples, Dr Mark Prentice, Dr Mary Quigley                      |
| Raigmore Hospital                                 | Dr Alison Nicholls, Dr Carol MacGregor, Dr David Whillis, Dr Kay Kelly, Dr Marion Paterson, Dr Neil McPhail, Dr Pinelopi Gkogkou, Dr Prantik Das          |
| Rotherham General Hospital                        | Dr Alex Bradshaw, Dr Bernadette Birtwhistle, Dr Matthew Hatton                                                                                            |
| Royal Albert Edward Infirmary                     | Dr Elena Takeuchi, Dr Gregory Wilson                                                                                                                      |
| Royal Berkshire Hospital                          | Dr Jocelyn Adams, Dr Madhumita Bhattacharyya, Dr Richard Brown                                                                                            |
| Royal Bournemouth Hospital                        | Dr Tamas Hickish                                                                                                                                          |
| Royal Derby Hospital                              | Dr Mojca Persic, Dr Pamela Woodings, Dr Prabir Chakraborti                                                                                                |
| Royal Free Hospital                               | Dr Alison Jones, Dr Jacqueline Newby                                                                                                                      |
| Royal Glamorgan Hospital                          | Dr Jacinta Abraham                                                                                                                                        |
| Royal Gwent Hospital                              | Dr Carys Morgan, Dr Chris Gaffney, Dr Mohammed Harb, Dr Robert Jones, Dr Simon Waters                                                                     |
| Royal Hampshire County Hospital                   | Dr Nicholas Murray, Dr Sanjay Raj, Dr Virginia Hall                                                                                                       |
| Royal Lancaster Infirmary                         | Dr David Eaton, Dr Sarah Moon                                                                                                                             |
| Royal Liverpool University Hospital               | Dr Nicola Thorp, Dr Susan O'Reilly                                                                                                                        |
| Royal Shrewsbury Hospital                         | Dr Huzeifa Gadir, Dr Laura Pettit, Dr Rajiv Agrawal, Dr Sheena Khanduri                                                                                   |
| Royal Surrey County Hospital                      | Dr Anthony Neal, Dr Robert Laing, Dr Stephen Houston                                                                                                      |
| Royal Sussex County Hospital                      | Dr Alistair Ring, Dr David Bloomfield, Dr Gargi Patel, Dr Richard Simcock, Dr Sarah Westwell                                                              |
| Royal United Hospital                             | Dr Abigail Jenner, Dr Hugh Newman, Dr Mark Beresford, Dr Rebecca Bowen, Dr Susan Masson, Dr Susana Mancero                                                |
| Russells Hall Hospital                            | Dr Georgi Georgiev, Dr Laura Pettit, Dr Muhammad Habibullah Khan, Dr Prakash Ramachandra, Dr Rozenn Allerton                                              |
| Salisbury District Hospital                       | Dr Clare Crowley, Dr Ellen Copson, Dr Jennifer Bradbury, Dr Melanie Harvey                                                                                |
| Sandwell General Hospital                         | Dr David Spooner                                                                                                                                          |
| Scarborough General Hospital                      | Dr Amandeep Dhabha                                                                                                                                        |
| Scunthorpe General Hospital                       | Dr Saiqa Spensley                                                                                                                                         |
| Solihull Hospital                                 | Dr Medy Tsalic                                                                                                                                            |
| South Tyneside District Hospital                  | Dr Goudarz Mazdai, Dr Helen Turnbull, Dr Nicola Cresti, Dr Prithvi Jampana                                                                                |
| Southampton General Hospital                      | Dr Clare Crowley, Dr Ellen Copson, Dr Jennifer Marshall, Dr Nicholas Murray, Dr Peter Simmonds, Dr Sanjay Raj                                             |
| Southend Hospital                                 | Dr Anne Robinson, Dr Colin Trask, Dr Hafiz Algurafi, Dr Helena Nam                                                                                        |
| Southport and Formby District General Hospital    | Dr Helen Neville-Webbe, Dr Khizar Hayat, Dr Nasim Ali                                                                                                     |
| St Bartholomew's Hospital                         | Dr Chris Cottrill, Dr Chris Gallagher, Dr Emma Spurrell, Dr John Conibear, Dr Karen Tipples, Dr Nita Patel, Dr Rebecca Roylance, Dr Virginia Wolstenholme |
| St. George's Hospital                             | Dr Ciara O'Hanlon Brown, Dr Laura Assersohn, Dr Muireann Kelleher                                                                                         |
| St. Mary's Hospital (IOW)                         | Dr Jennifer Marshall                                                                                                                                      |
| St. Mary's Hospital (London)                      | Dr Susan Cleator                                                                                                                                          |
| Stepping Hill Hospital                            | Dr Abbas Chittalia                                                                                                                                        |
| Stoke Mandeville Hospital                         | , Dr Andrew Theobald, Dr Anthony Kong, Dr Christopher Alcock, Dr Clare Jacobs, Dr Eleanor James, Dr Thinn Pwint                                           |
| Sunderland Royal Hospital                         | Dr A Radha Todd, Dr Kathryn Wright, Dr Sanjoy Chatterjee                                                                                                  |
| The County Hospital (Prev. Staffordshire General) | Dr Amjad Al-Niामी, Dr Apurna Jegannathen, Dr Caroline Brammer, Dr Laura Pettit                                                                            |
| The James Cook University Hospital                | Dr Alison Humphreys, Dr Nicola Storey                                                                                                                     |

|                                                    |                                                                                            |
|----------------------------------------------------|--------------------------------------------------------------------------------------------|
| The Tunbridge Wells Hospital (Prev. Kent & Sussex) | Dr Rema Jyothirmayi                                                                        |
| The Whittington Hospital                           | Dr Alison Jones, Dr Emma Spurrell, Dr Mulyati Mohamed, Prof Jayant Vaidya                  |
| Torbay Hospital                                    | Dr Andrew Goodman, Dr Peter Bliss                                                          |
| University Hospital                                | Dr Clive Irwin, Prof Chris Poole, Prof Robert Grieve                                       |
| University Hospital Aintree                        | Dr Julie O'Hagan, Dr Peter Robson                                                          |
| University Hospital Of Hartlepool                  | Dr Adrian Rathmell, Dr Eleanor Aynsley, Dr Nicola Storey                                   |
| University Hospital Of North Durham                | Dr Wendy Taylor                                                                            |
| University Hospital Of North Tees                  | Dr Janine Graham, Dr Nicola Storey                                                         |
| Velindre Hospital                                  | Dr Helen Passant, Dr Jacinta Abraham, Dr Nayyer Iqbal, Dr Rosie Stevens                    |
| Wansbeck General Hospital                          | Dr Anthony N Branson, Dr Helen Turnbull, Dr Nicola Cresti, Dr Rebecca Goranova             |
| Warrington Hospital                                | Prof Peter Clark                                                                           |
| Warwick Hospital                                   | Dr Nawaz Walji, Prof Robert Grieve                                                         |
| West Cumberland Hospital                           | Dr Paul Dyson                                                                              |
| West Middlesex University Hospital                 | Dr Pippa Riddle, Dr Rizvana Ahmad                                                          |
| West Suffolk Hospital,                             | Dr Anne Margaret Moody, Dr Cathryn Woodward                                                |
| Western General Hospital                           | Dr Angela Bowman, Dr Larry Hayward, Dr Olga Olkonomidou, Dr Peter Hall, Prof David Cameron |
| Weston Park Hospital                               | Dr Kash Purohit, Dr Matthew Hatton, Dr Matthew Winter, Prof Robert Coleman                 |
| Wexham Park Hospital                               | Dr Jocelyn Adams, Dr Narottam Thanvi, Dr Richard Ashford, Dr Ruth Davis                    |
| Whiston Hospital                                   | Dr Helen Innes, Dr Rajamram Sripadam                                                       |
| William Harvey Hospital                            | Dr Julia Hall, Dr Natasha Mithal                                                           |
| Worcester Royal Infirmary                          | Dr Jo Bowen, Dr Radhika Counsell                                                           |
| Worthing Hospital                                  | Dr Ashok Nikapota, Dr Rebecca Herbertson, Dr Sankha Mitra                                  |
| Wrexham Maelor Hospital                            | Dr Audrey Champion, Dr Niladri Ghosal, Dr Win Soe                                          |
| Wycombe General Hospital                           | Dr Andrew Weaver, Dr Bernadette Lavery, Dr Ketan Shah, Dr Pattie Beresford, Dr Thinn Pwint |
| Yeovil District Hospital                           | Dr Geoffrey Sparrow, Dr Julie Walther, Dr Urmila Barthakur                                 |
| Ysbyty Gwynedd                                     | Dr Catherine Bale, Dr Jill Bishop, Dr Rachel Williams                                      |

#### Trial Investigators/contributing sites, PIs, and patient numbers

| Randomising Site                      | Current PI                | Total Patients Randomised |
|---------------------------------------|---------------------------|---------------------------|
| Addenbrooke's Hospital                | Dr Helena Earl            | 95                        |
| Peterborough City Hospital            | Dr Karen McAdam           | 83                        |
| Norfolk & Norwich University Hospital | Dr Daniel Epurescu        | 78                        |
| Royal Sussex County Hospital          | Dr David Bloomfield       | 74                        |
| St Bartholomew's Hospital             | Dr Karen Tipples          | 65                        |
| Southampton General Hospital          | Dr Peter Simmonds         | 61                        |
| Royal Derby Hospital                  | Dr Pamela Woodings        | 60                        |
| Southend Hospital                     | Dr Hafiz Algurafi         | 60                        |
| Queen's Hospital (Romford)            | Dr Eliot Sims             | 58                        |
| Wexham Park Hospital                  | Dr Narottam Thanvi        | 58                        |
| Charing Cross Hospital                | Dr Susan Cleator          | 57                        |
| Maidstone Hospital                    | Dr Catherine Harper-Wynne | 57                        |
| New Cross Hospital                    | Dr Rakesh Mehra           | 56                        |
| Luton and Dunstable Hospital          | Dr Anup Vinayan           | 55                        |
| Royal Shrewsbury Hospital             | Dr Laura Pettit           | 55                        |
| Royal Liverpool University Hospital   | Dr Susan O'Reilly         | 54                        |
| Russells Hall Hospital                | Dr Rozenn Allerton        | 51                        |
| Cumberland Infirmary                  | Ms Helen Roe              | 50                        |
| Eastbourne District General Hospital  | Dr Charlotte Moss         | 50                        |
| Christie Hospital                     | Dr Anne Armstrong         | 49                        |
| Queen's Hospital (Burton)             | Dr Mojca Persic           | 48                        |
| Royal Hampshire County Hospital       | Dr Sanjay Raj             | 47                        |

|                                                   |                           |    |
|---------------------------------------------------|---------------------------|----|
| Great Western Hospital                            | Dr Shiroma De Silva-Minor | 46 |
| Royal Lancaster Infirmary                         | Dr David Eaton            | 45 |
| Barnet Hospital                                   | Dr Peter Ostler           | 44 |
| James Paget Hospital                              | Miss Sue Down             | 43 |
| Medway Maritime Hospital                          | Dr Maher Hadaki           | 43 |
| Princess Royal University Hospital                | Dr Mark Harries           | 42 |
| Cheltenham General Hospital                       | Dr Kim Benstead           | 41 |
| City Hospital                                     | Dr Mariam Jafri           | 41 |
| Conquest Hospital                                 | Dr Charlotte Moss         | 41 |
| Diana, Princess of Wales Hospital                 | Dr Mohammad Butt          | 41 |
| Manor Hospital                                    | Dr Sundus Yahya           | 41 |
| Mount Vernon Hospital                             | Dr David Miles            | 41 |
| Raigmore Hospital                                 | Dr Carol MacGregor        | 41 |
| King's College Hospital                           | Dr Anne Rigg              | 40 |
| Macclesfield District General Hospital            | Dr Lisa Barraclough       | 39 |
| Queen Elizabeth Hospital (Birmingham)             | Dr Daniel Rea             | 39 |
| Torbay Hospital                                   | Dr Andrew Goodman         | 39 |
| University Hospital Of North Durham               | Dr Wendy Taylor           | 39 |
| Warwick Hospital                                  | Dr Nawaz Walji            | 38 |
| Guy's Hospital                                    | Dr Janine Mansi           | 37 |
| The County Hospital (Prev. Staffordshire General) | Dr Apurna Jegannathen     | 37 |
| St. George's Hospital                             | Dr Muireann Kelleher      | 36 |
| Yeovil District Hospital                          | Dr Urmila Barthakur       | 35 |
| Clatterbridge Centre for Oncology                 | Dr Zafar Malik            | 34 |
| Queen Elizabeth Hospital (King's Lynn)            | Dr Margaret Daly          | 34 |
| Queen Elizabeth Hospital (London)                 | Dr Hartmut Kristeleit     | 34 |
| Southport and Formby District General Hospital    | Dr Helen Neville-Webbe    | 34 |
| Stoke Mandeville Hospital                         | Dr Andrew Eichholz        | 34 |
| Royal Free Hospital                               | Dr Jacqueline Newby       | 33 |
| William Harvey Hospital                           | Dr Natasha Mithal         | 32 |
| Darent Valley Hospital                            | Dr Catherine Harper-Wynne | 31 |
| North Middlesex Hospital                          | Dr Fharat Raja            | 31 |
| Royal United Hospital                             | Dr Rebecca Bowen          | 31 |
| Sunderland Royal Hospital                         | Dr Kathryn Wright         | 31 |
| Chesterfield Royal Hospital                       | Dr Omar Din               | 29 |
| Musgrove Park Hospital                            | Dr Mohini Varughese       | 28 |
| Queen Alexandra Hospital                          | Dr Caroline Archer        | 28 |
| Salisbury District Hospital                       | Mrs Catherine Reed        | 28 |
| The James Cook University Hospital                | Dr Alison Humphreys       | 28 |
| Essex County Hospital                             | Dr Mukesh Mukesh          | 27 |
| Kent and Canterbury Hospital                      | Dr Jane Brown             | 27 |
| University Hospital Of North Tees                 | Dr Nicola Storey          | 27 |
| West Suffolk Hospital                             | Dr Anne Margaret Moody    | 27 |
| Ysbyty Gwynedd                                    | Dr Catherine Bale         | 27 |
| Bedford General Hospital                          | Dr Sarah Smith            | 26 |
| Royal Gwent Hospital                              | Dr Simon Waters           | 26 |
| University Hospital                               | Prof Robert Grieve        | 26 |
| Kidderminster Hospital                            | Dr Mark Churn             | 25 |
| Queen Elizabeth Hospital (Gateshead)              | Dr Daniela Lee            | 25 |
| Wycombe General Hospital                          | Dr Andrew Eichholz        | 25 |
| Bradford Royal Infirmary                          | Dr Chris Bradley          | 24 |
| St. Mary's Hospital (IOW)                         | Dr Jennifer Marshall      | 24 |
| Whiston Hospital                                  | Dr Helen Innes            | 24 |
| Worthing Hospital                                 | Dr Adrian Moss            | 24 |
| Northampton General Hospital                      | Dr Roshan Agarwal         | 23 |
| Aberdeen Royal Infirmary                          | Dr Trevor McGoldrick      | 22 |
| Borders General Hospital                          | Dr Carolyn Bedi           | 22 |
| County Hospital                                   | Dr Daniel Nelmes          | 22 |

|                                                    |                           |    |
|----------------------------------------------------|---------------------------|----|
| George Eliot Hospital                              | Dr Susan Lupton           | 22 |
| Royal Surrey County Hospital                       | Dr Anthony Neal           | 22 |
| St. Mary's Hospital (London)                       | Dr Susan Cleator          | 22 |
| Dorset County Hospital                             | Dr Perric Crellin         | 21 |
| East Surrey Hospital                               | Dr Chee Goh               | 21 |
| Lister Hospital                                    | Dr Nihal Shah             | 21 |
| The Whittington Hospital                           | Prof Jayant Vaidya        | 21 |
| Castle Hill Hospital                               | Dr Amandeep Dhadda        | 20 |
| Halton General Hospital                            | Dr Joanne Cliff           | 20 |
| Scarborough General Hospital                       | Dr Amandeep Dhadda        | 20 |
| South Tyneside District Hospital                   | Dr Daniela Lee            | 20 |
| Warrington Hospital                                | Dr Joanne Cliff           | 20 |
| Western General Hospital                           | Dr Larry Hayward          | 20 |
| Newham General Hospital                            | Dr Karen Tipples          | 19 |
| University Hospital Aintree                        | Dr Julie O'Hagan          | 19 |
| Barnsley District Hospital                         | Dr Shobha Silva           | 17 |
| Blackpool Victoria Hospital                        | Dr Pavel Bezecky          | 17 |
| Dumfries and Galloway Royal Infirmary              | Dr Larry Hayward          | 17 |
| North Tyneside General Hospital                    | Dr Mahtab Najibah         | 17 |
| University Hospital Of Hartlepool                  | Dr Nicola Storey          | 17 |
| Wrexham Maelor Hospital                            | Dr Win Soe                | 17 |
| West Middlesex University Hospital                 | Dr Rizvana Ahmad          | 16 |
| Broomfield Hospital                                | Prof Saad Tahir           | 15 |
| Glan Clwyd Hospital                                | Dr Jill Bishop            | 15 |
| Lincoln County Hospital                            | Dr Chiara Intrivici       | 15 |
| Royal Berkshire Hospital                           | Dr Jocelyn Adams          | 15 |
| Basildon and Thurrock University Hospital          | Dr Helen Swinburn         | 14 |
| Ipswich Hospital                                   | Dr Karen E Sherwin        | 14 |
| North Devon District Hospital                      | Dr Kate Scatchard         | 14 |
| Queen Elizabeth The Queen Mother Hospital          | Dr Natasha Mithal         | 14 |
| Airedale General Hospital                          | Dr Shazza Rehman          | 13 |
| Darlington Memorial Hospital                       | Dr Wendy Taylor           | 13 |
| The Tunbridge Wells Hospital (Prev. Kent & Sussex) | Dr Catherine Harper-Wynne | 13 |
| Pinderfields Hospital                              | Dr Jay Naik               | 12 |
| Poole Hospital                                     | Dr Amitabha Chakrabarti   | 12 |
| Royal Glamorgan Hospital                           | Dr Jacinta Abraham        | 12 |
| Velindre Hospital                                  | Dr Jacinta Abraham        | 12 |
| Basingstoke and North Hampshire Hospital           | Dr Sanjay Raj             | 11 |
| Hinchingbrooke Hospital                            | Dr Cheryl Palmer          | 11 |
| Milton Keynes Hospital                             | Dr Maria Karina           | 11 |
| Wansbeck General Hospital                          | Dr Mahtab Najibah         | 11 |
| Weston Park Hospital                               | Dr Matthew Winter         | 11 |
| Worcester Royal Infirmary                          | Dr Mark Churn             | 11 |
| Alexandra Hospital                                 | Dr Mark Churn             | 10 |
| Doncaster Royal Infirmary                          | Dr Lynda Wyld             | 10 |
| Furness General Hospital                           | Dr David Eaton            | 10 |
| Good Hope Hospital                                 | Dr Medy Tsalic            | 10 |
| Nottingham City Hospital                           | Dr Stephen Chan           | 10 |
| Princess of Wales Hospital                         | Dr Richard Webster        | 10 |
| Birmingham Heartlands Hospital                     | Dr Indrajit Fernando      | 8  |
| King's Mill Hospital                               | Dr Sarah Khan             | 8  |
| Pilgrim Hospital                                   | Dr Chiara Intrivici       | 8  |
| Ealing Hospital                                    | Dr Olivia Hatcher         | 7  |
| Northwick Park Hospital                            | Dr Andreas Makris         | 7  |
| Royal Albert Edward Infirmary                      | Dr Elena Takeuchi         | 7  |
| Royal Bournemouth Hospital                         | Dr Tamas Hickish          | 7  |
| Nevill Hall Hospital                               | Dr Theresa Howe           | 6  |
| Rotherham General Hospital                         | Dr Matthew Hatton         | 6  |

|                                  |                     |   |
|----------------------------------|---------------------|---|
| Scunthorpe General Hospital      | Dr Waqas Ali        | 6 |
| Ashford Hospital                 | Dr May Teoh         | 5 |
| Bishop Auckland General Hospital | Dr Wendy Taylor     | 5 |
| Prince Charles Hospital          | Dr Jacinta Abraham  | 5 |
| Solihull Hospital                | Dr Medy Tsalic      | 5 |
| Hexham General Hospital          | Dr Mahtab Najibah   | 4 |
| Sandwell General Hospital        | Dr Mariam Jafri     | 4 |
| Freeman Hospital                 | Dr Mark Verrill     | 3 |
| Friarage Hospital                | Dr Alison Humphreys | 3 |
| King Edward VII Hospital         | Dr Narottam Thanvi  | 3 |
| Dewsbury and District Hospital   | Dr Jay Naik         | 1 |
| Leighton Hospital                | Dr Laura Horsley    | 1 |
| Stepping Hill Hospital           | Dr Abbas Chittalia  | 1 |
| West Cumberland Hospital         | Ms Helen Roe        | 1 |
